# Supplementary material
Source: Springer Nature journal article supplement (https://www.springermedizin.de/resource/supplementary/12877_2012_809_MOESM4_ESM.pdf/9440622)

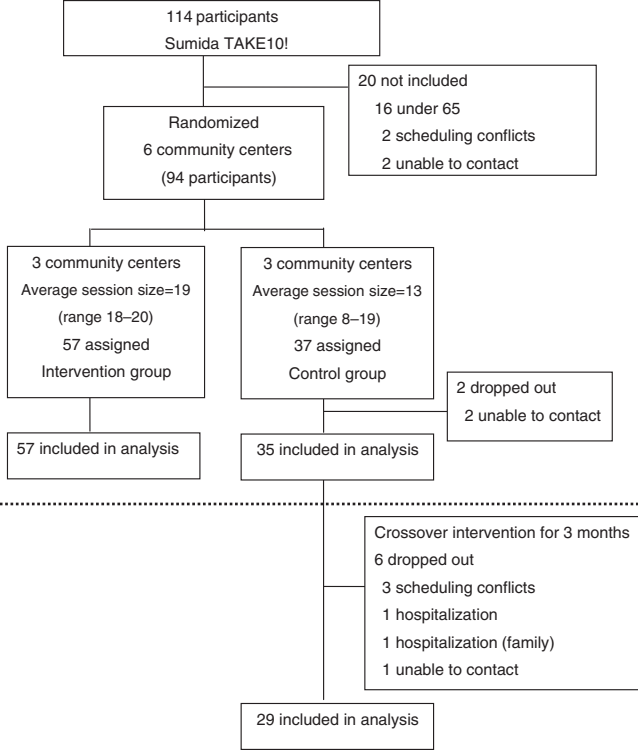

Supplement: MOESM4 [file 9440622]
